# Supplementary material for: Familial Contributions to the Association Between Low Birth Weight and Risk of CKD in Adult Life
Source: PubMed Central journal article supplement — Kidney Int Rep. 2021 May 30;6(8):2151–8. doi: 10.1016/j.ekir.2021.05.032 (PMC8343716; doi:10.1016/j.ekir.2021.05.032), 2021-05-30
Supplement: mmc1.pdf [file mmc1.pdf]

**Supplemental Table 1. Sex stratified analysis of risk of CKD according to whether the individual or at least one of his/her siblings had LBW, SGA or preterm birth. Norway 1967-2016.**

| Subject           | Sibling           | Men   |                  |         | Women |                  |         |
|-------------------|-------------------|-------|------------------|---------|-------|------------------|---------|
|                   |                   | N CKD | aOR (95% CI)     | p-value | N CKD | aOR (95% CI)     | p-value |
| Not LBW           | Not LBW           | 1,455 | 1.0 (ref)        |         | 958   | 1.0 (ref)        |         |
|                   | LBW               | 252   | 1.43 (1.25-1.63) | <0.001  | 136   | 1.17 (0.98-1.40) | 0.1     |
| LBW               | Not LBW           | 183   | 1.68 (1.40-1.90) | <0.001  | 143   | 1.99 (1.67-2.37) | <0.001  |
|                   | LBW               | 120   | 1.67 (1.38-2.01) | <0.001  | 86    | 1.93 (1.55-2.40) | <0.001  |
| Not SGA           | Not SGA           | 1,399 | 1.0 (ref)        |         | 938   | 1.0 (ref)        |         |
|                   | SGA               | 198   | 1.26 (1.09-1.47) | <0.001  | 125   | 1.21 (1.00-1.50) | 0.03    |
| SGA               | Not SGA           | 186   | 1.68 (1.44-2.00) | <0.001  | 134   | 1.83 (1.52-2.19) | <0.001  |
|                   | SGA               | 133   | 2.16 (1.80-2.60) | <0.001  | 74    | 1.83 (1.44-2.33) | <0.001  |
| Not preterm birth | Not preterm birth | 1,753 | 1.0 (ref)        |         | 1,173 | 1.0 (ref)        |         |
|                   | Preterm birth     | 137   | 1.28 (1.07-1.53) | 0.003   | 82    | 1.15 (0.92-1.44) | 0.2     |
| Preterm birth     | Not preterm birth | 106   | 1.52 (1.25-1.85) | <0.001  | 55    | 1.31 (1.00-1.71) | 0.05    |
|                   | Preterm birth     | 21    | 1.04 (0.68-1.61) | 0.8     | 19    | 1.56 (0.98-2.46) | 0.06    |

\* Adjusted for gender, maternal disease (defined as maternal diabetes mellitus, kidney disease, rheumatic disease or essential hypertension diagnosed before pregnancy) and number of recorded siblings categorized as 1, 2 or  $\geq 3$ .

**Supplemental Table 2. Risk for ESKD in Ruggajo et al and Risk of CKD during the first 40 years of age in Present study According to Whether Included Individual or at least 1 Sibling Had LBW, SGA, or Preterm Birth. Unadjusted analyses.**

| Subject           | Sibling           | Ruggajo et al. 2016 |               |                       |         | Gjerde et al. 2021 |              |                     |         |
|-------------------|-------------------|---------------------|---------------|-----------------------|---------|--------------------|--------------|---------------------|---------|
|                   |                   | Total No.           | No. with ESKD | Hazard ratio (95% CI) | p-value | Total No           | No. with CKD | Odds ratio (95% CI) | p-value |
| Not LBW           | Not LBW           | 1,492,968           | 387           | 1.0 (ref)             |         | 1,156,266          | 1,772        | 1.0 (ref)           |         |
|                   | LBW               | 178,720             | 57            | 1.20 (0.91-1.59)      | 0.2     | 134,321            | 256          | 1.24 (1.09-1.42)    | 0.1     |
| LBW               | Not LBW           | 110,577             | 49            | 1.59 (1.18-2.14)      | 0.02    | 143                | 216          | 1.77 (1.53-2.03)    | 0.001   |
|                   | LBW               | 69,815              | 34            | 1.78 (1.26-2.53)      | 0.01    | 86                 | 132          | 1.71 (1.43-2.04)    | 0.001   |
| Not SGA           | Not SGA           | 1,378,340           | 351           | 1.0 (ref)             |         | 1,110,618          | 1695         | 1.0 (ref)           |         |
|                   | SGA               | 160,133             | 44            | 1.00 (0.73-1.36)      | 0.9     | 119,306            | 219          | 1.20 (1.04-1.38)    | 0.01    |
| SGA               | Not SGA           | 102,930             | 44            | 1.49 (1.10-2.03)      | 0.007   | 77,055             | 210          | 1.79 (1.55-2.06)    | 0.001   |
|                   | SGA               | 61,235              | 33            | 1.73 (1.21-2.48)      | 0.002   | 42,970             | 137          | 2.09 (1.75-2.50)    | 0.001   |
| Not preterm birth | Not preterm birth | 1,538,469           | 426           | 1.0 (ref)             |         | 1,281,381          | 2096         | 1.0 (ref)           |         |
|                   | Preterm birth     | 101,435             | 33            | 1.23 (0.87-1.76)      | 0.2     | 79,302             | 145          | 1.12 (0.94-1.32)    | 0.195   |
| Preterm birth     | Not preterm birth | 62,029              | 21            | 1.32 (0.85-2.04)      | 0.2     | 47,069             | 112          | 1.45 (1.20-1.80)    | 0.001   |
|                   | Preterm birth     | 19,393              | 6             | 1.42 (0.63-3.18)      | 0.4     | 14,230             | 31           | 1.33 (0.93-1.90)    | 0.114   |

ESKD: End-stage kidney disease. CKD: Chronic kidney disease.
